# Supplementary material
Source: PubMed Central journal article supplement (PMC5048493)
Supplement: NIHMS779154-supplement-supplement_1.pdf [file NIHMS779154-supplement-supplement_1.pdf]

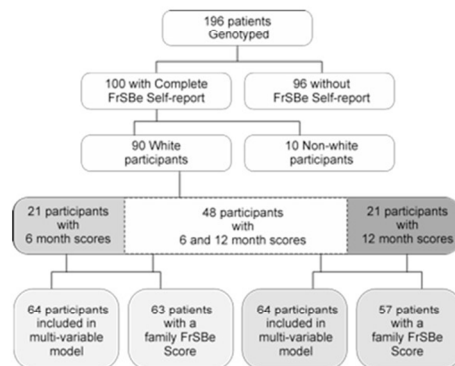

Supplemental Figure 1: Flow diagram illustrating the breakdown of the original 193 participants genotyped. Note: In the final sample, there are 90 unique participants, and of those, 48 have complete data at both time points, 21 have complete data only at 6 months, and 21 have complete data only at 12 months. 338x190mm (96 x 96 DPI)
